# Supplementary material for: Promoting effect of zirconium oxide on Cu–Al2O3catalyst for the hydrogenolysis of glycerol to 1,2-propanediol
Source: Royal Society of Chemistry journal article supplement (doi:10.1039/c6cy00085a), 2016-01-01
Supplement: c6cy00085a1.pdf [file c6cy00085a1.pdf]

**Promoting effect of zirconium oxide on Cu-Al<sub>2</sub>O<sub>3</sub> catalyst for the hydrogenolysis of  
glycerol to 1,2-propanediol**

Fufeng Cai, Wei Zhu and Guomin Xiao\*

School of Chemistry and Chemical Engineering, Southeast University, Nanjing 211189,  
China

\*Corresponding author E-mail address: xiaogm@seu.edu.cn. Tel./Fax: +86 25 52090612.

This supplementary material includes:

- Figure S1. Schematic diagram of the experimental apparatus.
- Figure S2. Pore distribution profiles of the catalysts.
- Table S1. Binding energies and atomic ratios of reduced catalysts obtained from XPS analysis.

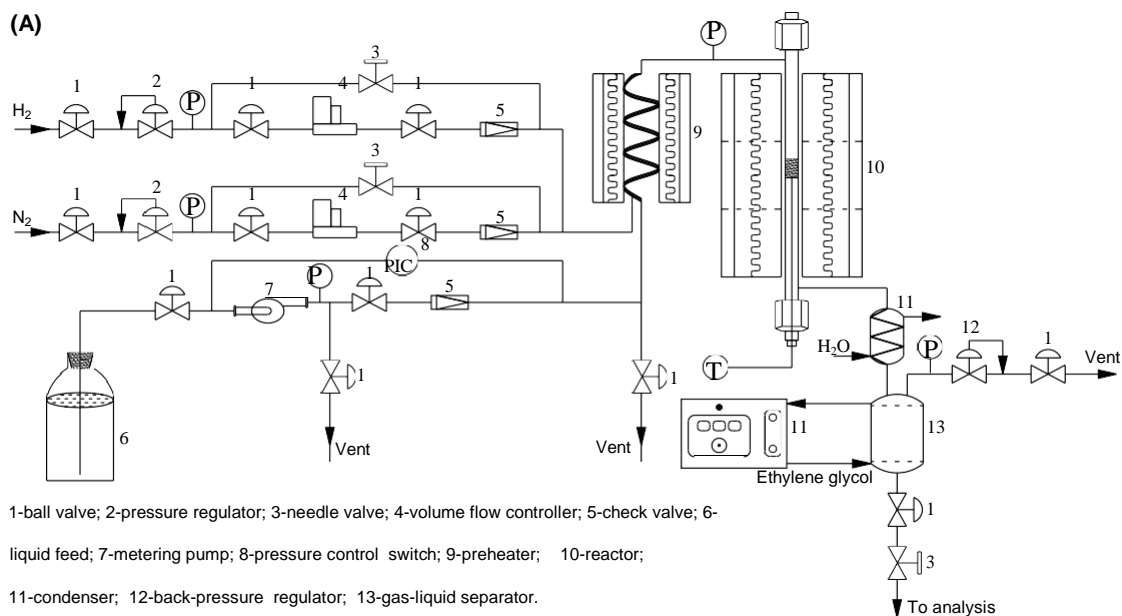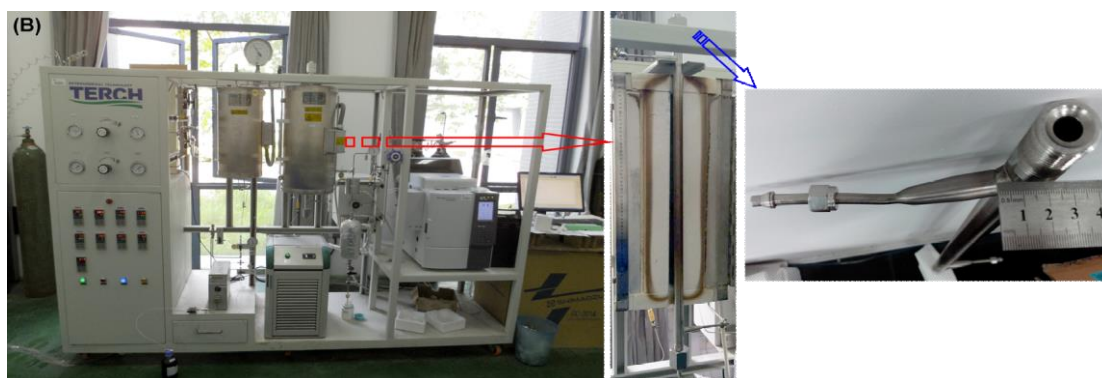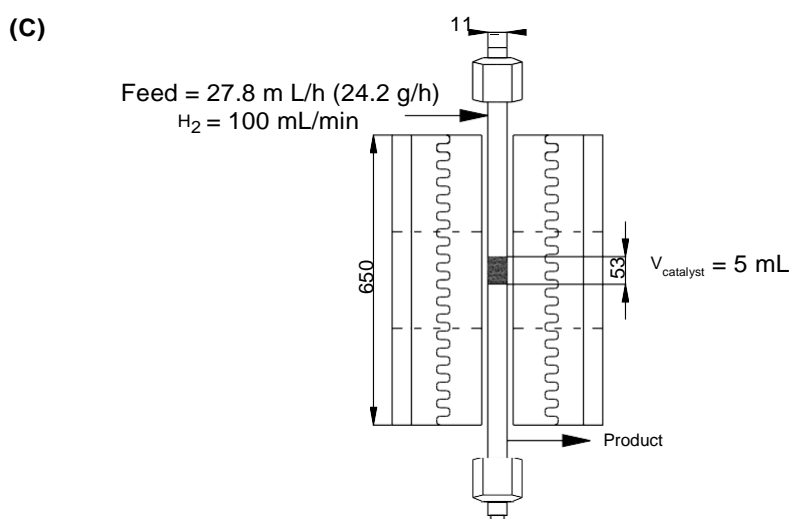

**Figure S1.** Schematic diagram (A), side view (B) and flow diagram (C) of the experimental apparatus.

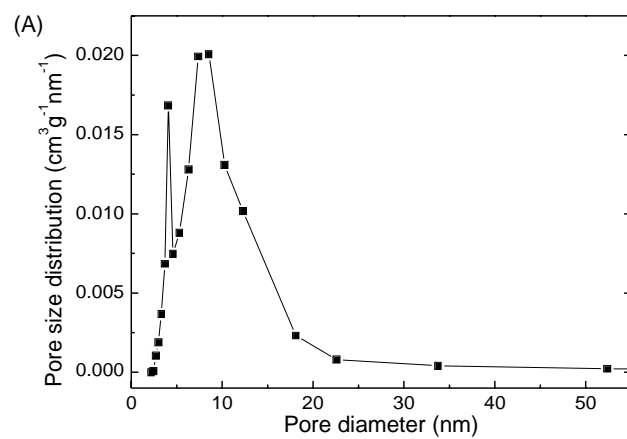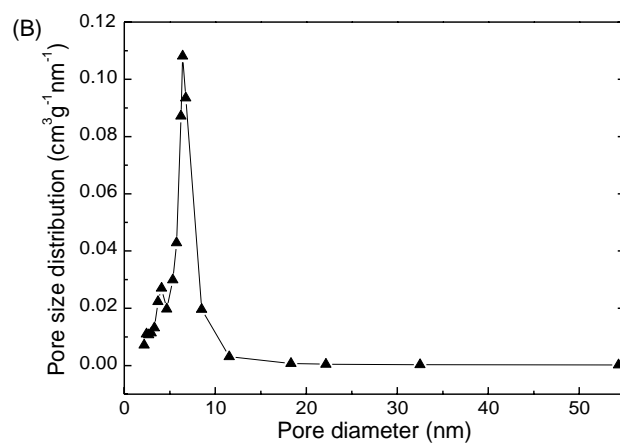

**Figure S2.** Pore distribution profiles of the representative catalysts:  $\text{Cu-Al}_2\text{O}_3$  (A) and  $20\text{ZrCu-Al}_2\text{O}_3$  (B).

**Table S1.** Binding energies and atomic ratios of reduced catalysts obtained from XPS analysis.

| Catalyst                              | Binding energy (eV)  |                      |                      |                      |                      |                      |              | Atomic ratio |       |
|---------------------------------------|----------------------|----------------------|----------------------|----------------------|----------------------|----------------------|--------------|--------------|-------|
|                                       | Cu 2p <sub>3/2</sub> | Cu 2p <sub>1/2</sub> | Zr 3d <sub>5/2</sub> | Zr 3d <sub>3/2</sub> | Al 2p <sub>3/2</sub> | Al 2p <sub>1/2</sub> | O 1s         | Cu/Al        | Zr/Al |
| Cu-Al <sub>2</sub> O <sub>3</sub>     | 932.6                | 952.5                | -                    | -                    | 73.6                 | 74.3                 | 531.4, 533.2 | 0.104        | -     |
| 5ZrCu-Al <sub>2</sub> O <sub>3</sub>  | 932.6                | 952.5                | 182.1                | 184.6                | 73.5                 | 74.1                 | 531.3, 533.1 | 0.113        | 0.023 |
| 10ZrCu-Al <sub>2</sub> O <sub>3</sub> | 932.7                | 952.6                | 182.1                | 184.5                | 73.3                 | 74.0                 | 531.1, 533.1 | 0.121        | 0.040 |
| 20ZrCu-Al <sub>2</sub> O <sub>3</sub> | 932.8                | 952.6                | 182.0                | 184.4                | 73.2                 | 73.9                 | 531.0, 533.0 | 0.134        | 0.074 |
| 30ZrCu-Al <sub>2</sub> O <sub>3</sub> | 932.9                | 952.7                | 181.9                | 184.3                | 73.1                 | 73.8                 | 530.9, 532.9 | 0.129        | 0.111 |
